# Supplementary material for: Availability and Metabolic Fate of Olive Phenolic Alcohols Hydroxytyrosol and Tyrosol in the Human GI Tract Simulated by the In Vitro GIDM–Colon Model
Source: MDPI journal article supplement (doi:10.3390/metabo12050391), 2022-04-26
Supplement: s1 [file s1]

# **Availability and Metabolic Fate of Olive Phenolic Alcohols Hydroxytyrosol and Tyrosol in the Human GI Tract Simulated by the In Vitro GIDM–Colon Model**

**Maria Eleni Sakavitsi <sup>1</sup>, Annelies Breynaert <sup>2</sup>, Theodora Nikou <sup>1</sup>, Stef Lauwers <sup>2</sup>,  
Luc Pieters <sup>2</sup>, Nina Hermans <sup>2,\*</sup> and Maria Halabalaki <sup>1,\*</sup>**

<sup>1</sup> Division of Pharmacognosy and Natural Products Chemistry, Department of Pharmacy,  
National and Kapodistrian University of Athens, 15771 Athens, Greece; msakavitsi@pharm.uoa.gr (M.E.S.);  
th-nikou@pharm.uoa.gr (T.N.)

<sup>2</sup> Natural Products & Food Research and Analysis (NatuRA), Department of Pharmaceutical Sciences,  
University of Antwerp, 2000 Antwerp, Belgium; annelies.breynaert@uantwerpen.be (A.B.);  
stef.lauwers@uantwerpen.be (S.L.); luc.pieters@uantwerpen.be (L.P.)

\* Correspondence: nina.hermans@uantwerpen.be (N.H.); mariahal@pharm.uoa.gr (M.H.);  
Tel.: +32-32652732 (N.H.); +30-2107274781 (M.H.)

**Table S1:** Sample coding and collection time points

| Codes of Samples | Compartment/Type of Samples | Time point |
|------------------|-----------------------------|------------|
| S0H              | Stomach                     | T=0h       |
| S1H              | Stomach                     | T=1h       |
| SID              | Small Intestine Dialysates  | T=1.5h     |
| SIR              | Small Intestine Retentates  | T=1.5h     |
| C2H              | Colon Dialysates            | T=2h       |
| C4H              | Colon Dialysates            | T=4h       |
| C6H              | Colon Dialysates            | T=6h       |
| C24H             | Colon Dialysates            | T=24h      |

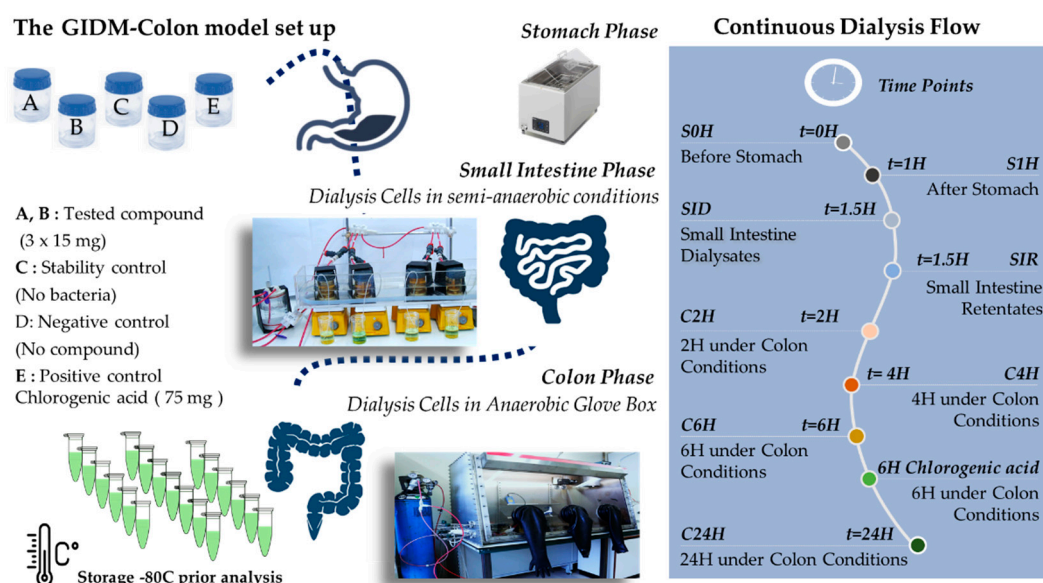

**Figure S1:** The continous dialysis *in vitro* GIDM-Colon model set up. **A,B cells:** 15mg of HTyr or Tyr; **C cells:** Stability control (15mg of HTyr or Tyr, no bacteria); **D cells:** Negative control (no compounds, with bacteria); **E cells:** Positive control (75mg of chlorogenic acid, no tested compounds, with bacteria); Time points: **S0H** are the samples collected at the time of administration of tested compounds and control samples at the gastric conditions. **S1H** are the samples collected after 1h exposure in gastric conditions. **SID** are the dialysate samples collected after 1.5h of their exposure to small intestine conditions that have followed passive diffusion by passing through the cell membrane. **SIR** are the retentate samples collected after 1.5h of their exposure to small intestine conditions that have not passed the cell membrane. The retentates of small intestine were subjected to colon phase by adding fecal bacteria and transferring them in anaerobic glove box. The collection for colon phase started 2h after the samples were exposed to colon conditions and passed the cell membranes. **C2H, C4H, C6H, C24H** are the dialysate samples after 2h, 4h, 6h, 24h exposed to colon conditions. Stomach and small intestine samples were collected in biological duplicates and colon samples in triplicates. All samples were stored to -80°C prior analysis.

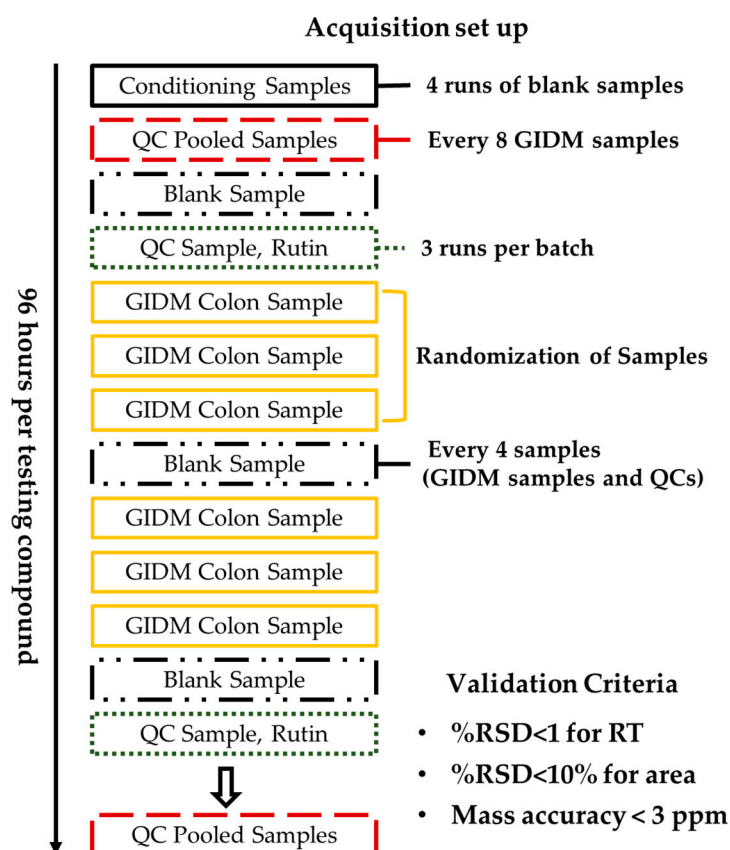

**Figure S2:** UPLC-HRMS analysis set up for untargeted metabolomics approach. *Conditioning, blank, quality control (QC)-pooled* (mixture of all GIDM-colon samples) and *analytical QC* (rutin 100ug/ml) samples were used. Randomisation of GIDM-colon samples was applied to avoid bias. Monitoring of selected peaks in QC-pooled samples were also considered throughout the acquisition to ensure system stability and repeatability as well as to avoid induced (technical) variability.

**Table S2:** Processing parameters of MZmine 2.53.

| MZmine 2.53                                  | Tyr              | HTyr             |
|----------------------------------------------|------------------|------------------|
| <b>1.Mass Detection</b>                      |                  |                  |
| RT                                           | 3-18min          | 3-18min          |
| Noise Level                                  | 5E4              | 5E4              |
| <b>2.Chromatogram Builder</b>                |                  |                  |
| Time span                                    | 0.03             | 0.03             |
| <b>3.Chromatogram deconvolution</b>          |                  |                  |
| Algorithm                                    | Local min search | Local min search |
| Peak duration                                | 0.03-0.7min      | 0.03-1min        |
| <b>4.Isotopic peaks grouper</b>              |                  |                  |
| <i>m/z</i> tolerance                         | 0.001-5ppm       | 0.001-5ppm       |
| RT tolerance                                 | 0.05min          | 0.05min          |
| <b>5.Alignment</b>                           |                  |                  |
| Algorithm                                    | Join aligner     | Join aligner     |
| <b>6.Filtering: Feature lists row filter</b> |                  |                  |
| Min peaks per row                            | 2                | 2                |
| <b>7.Gap Filling</b>                         |                  |                  |
| Intensity tolerance                          | 20%              | 20%              |

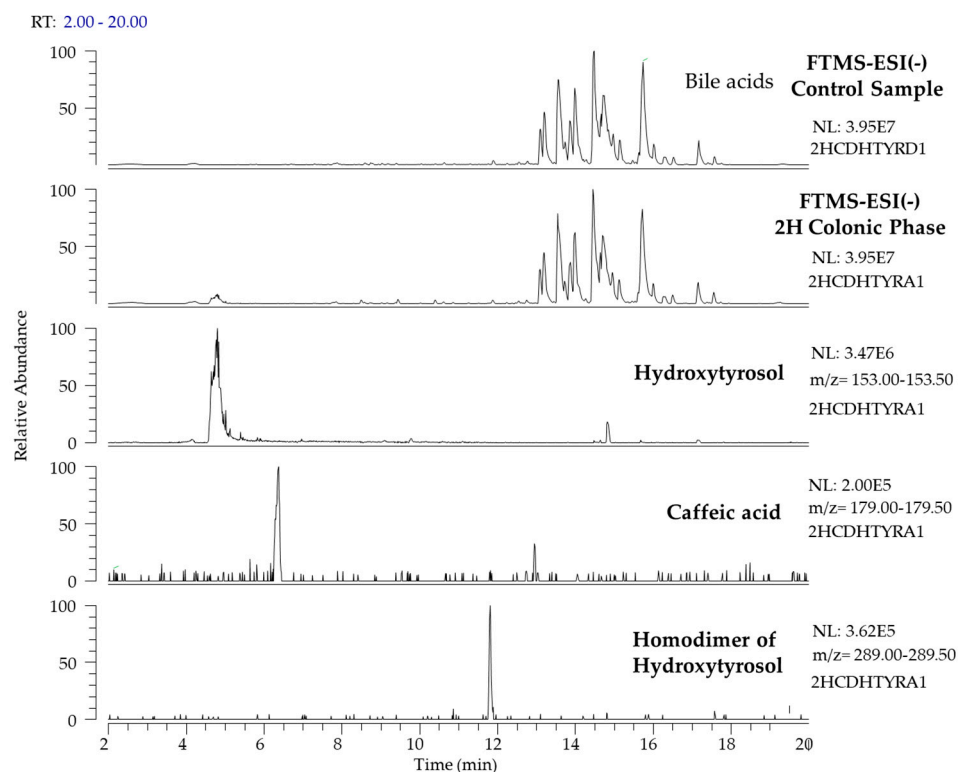

**Figure S3:** Indicatives UPLC-ESI(-)HRMS chromatograms of negative control sample of **C2H**; Base peak chromatogram of **C2H**; XIC chromatograms of **HTyr** (@m/z 153), **Caffeic acid** (@m/z 179) and Homodimer of HTyr (**HTyr26** @m/z 289).

### HRMS spectra of Hydroxytyrosol (HTyr) and Tyrosol (Tyr) Metabolites

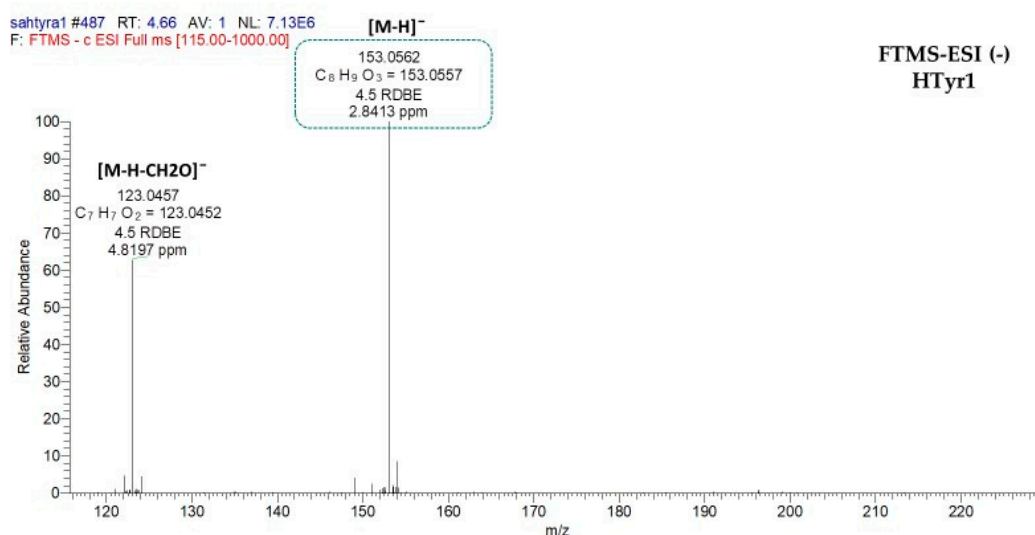

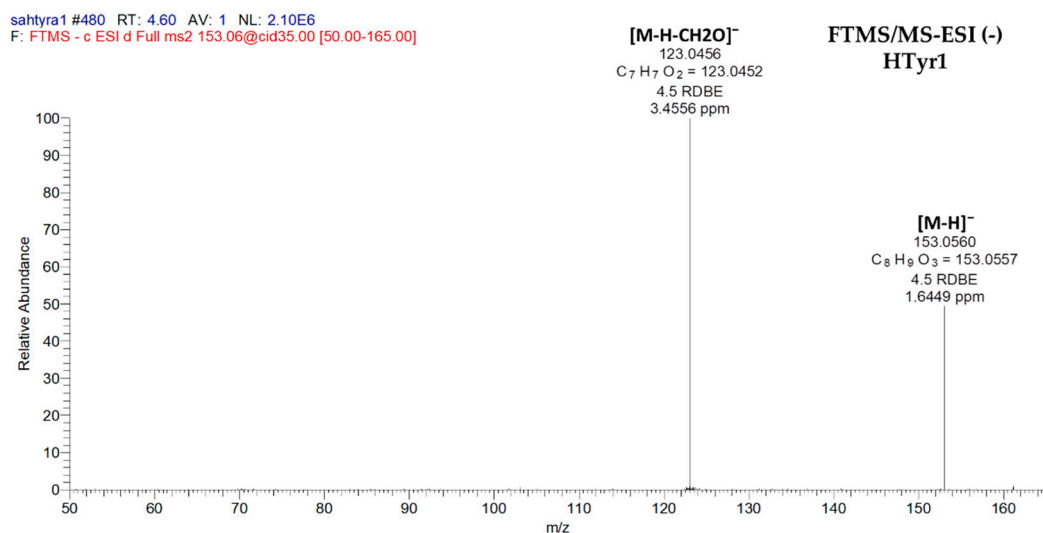

**Figure S4:** HRMS spectra, full scan (upper) and HRMS/MS (down) of HTyr1.

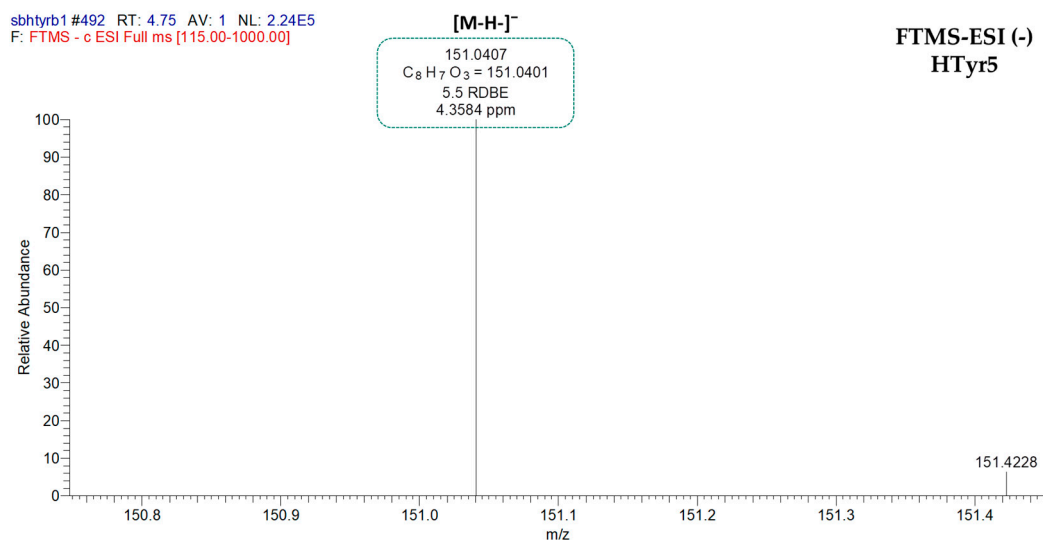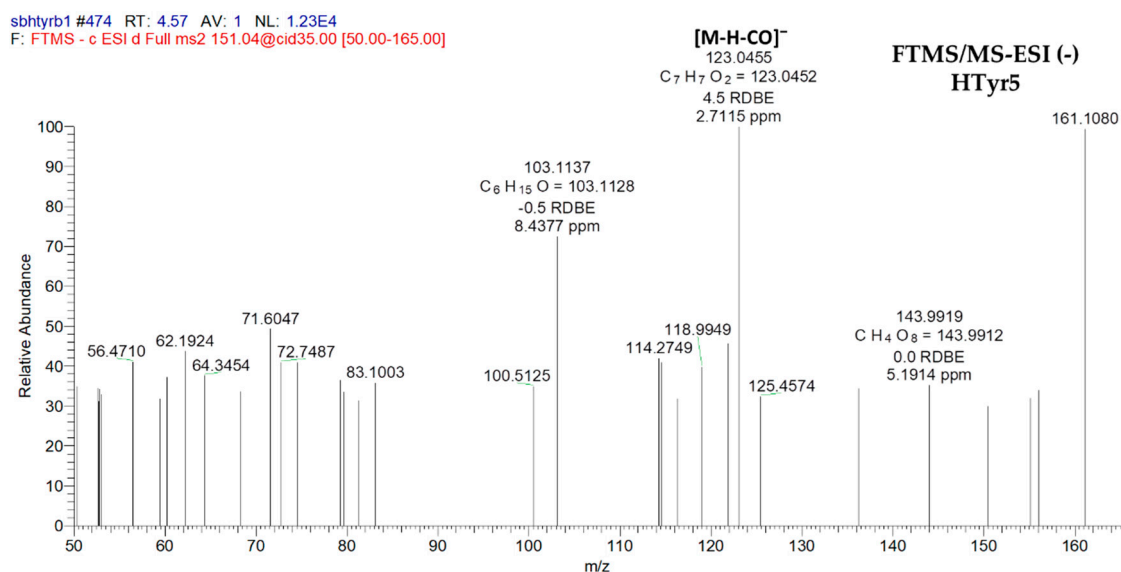

**Figure S5:** HRMS spectra, full scan (upper) and MS/MS (down) of HTyr5.

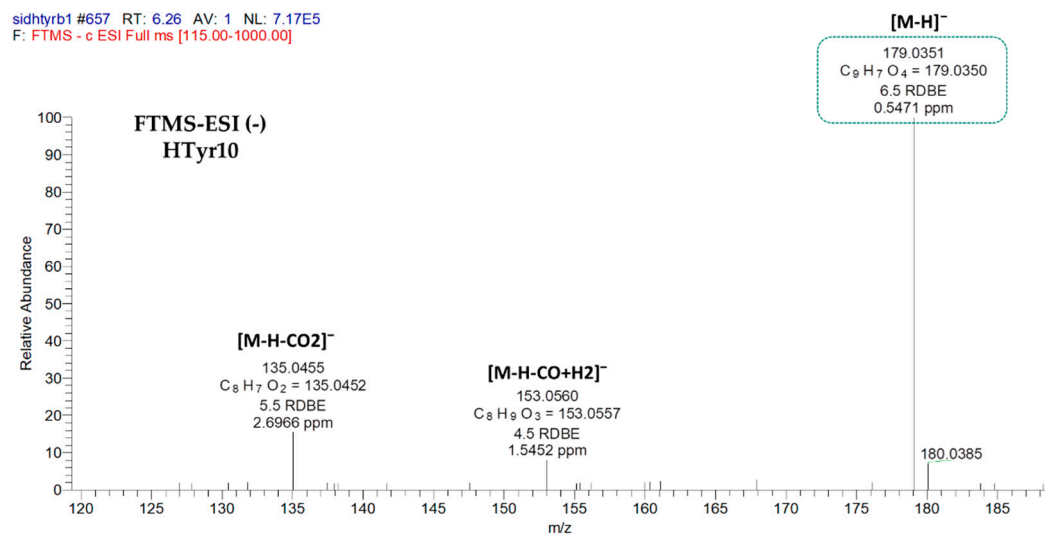

**Figure S6:** HRMS full scan spectrum of HTyr10.

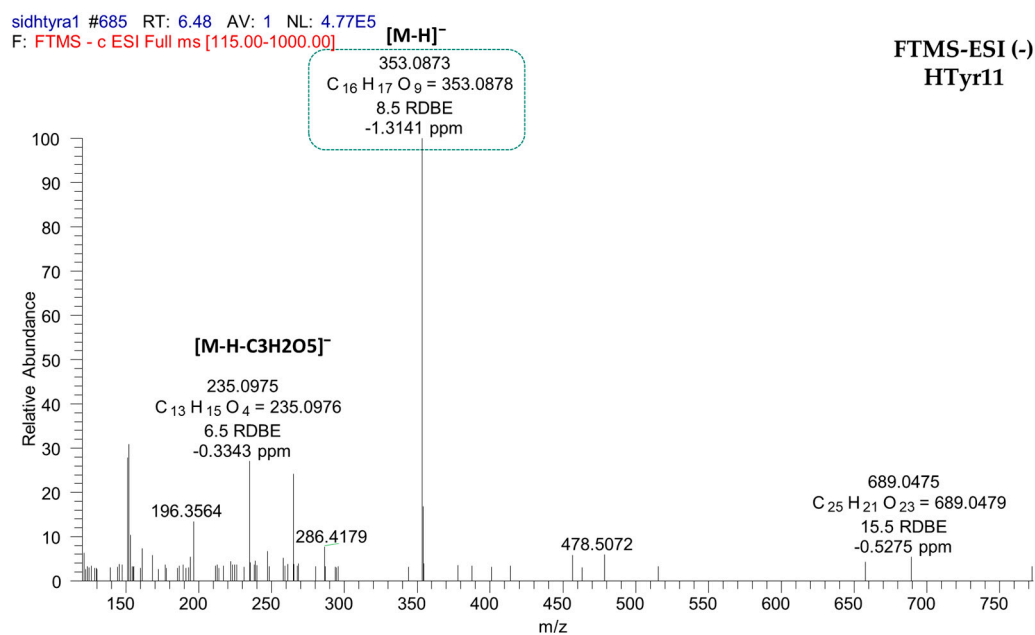

sidhtyra1 #689 RT: 6.53 AV: 1 NL: 5.75E4  
F: FTMS - c ESI d Full ms2 353.09@cid35.00 [85.00-365.00]

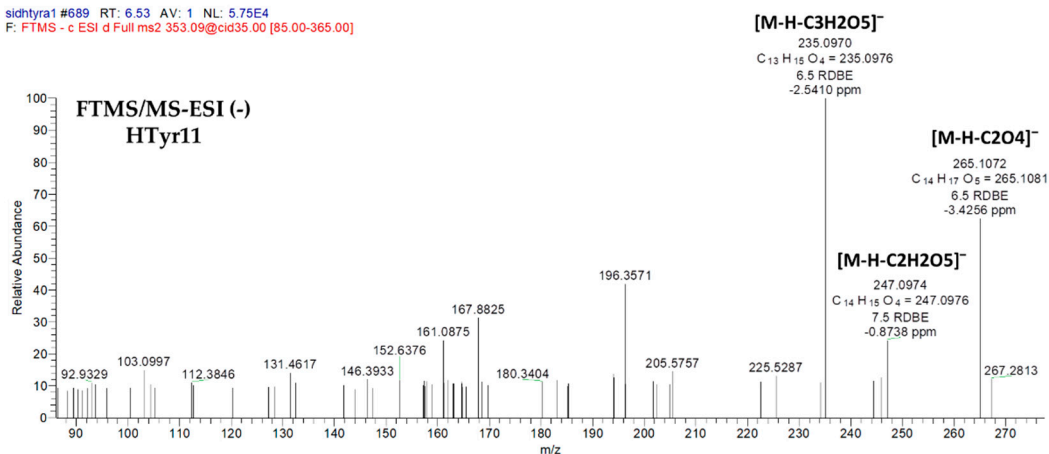

Figure S7: HRMS spectra, full scan (upper) and MS/MS (down) of HTyr11.

4hcdhtyra1#849 RT: 8.06 AV: 1 NL: 1.81E5  
F: FTMS - c ESI Full ms [115.00-1000.00]

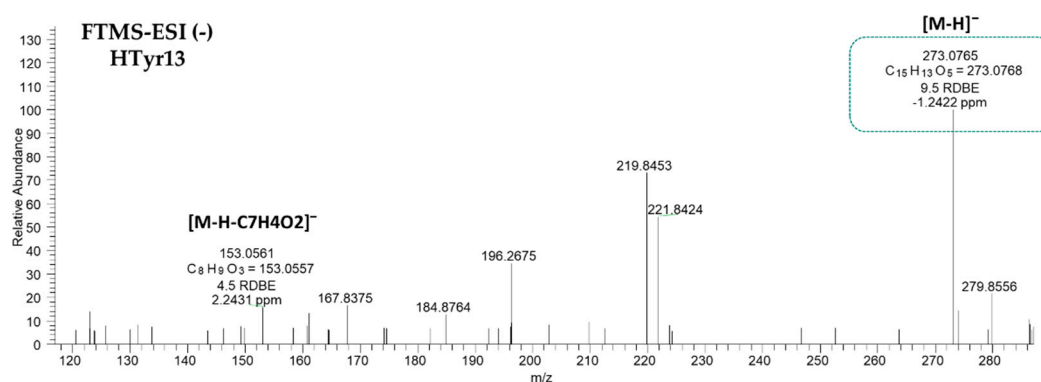

Figure S8: HRMS full scan spectrum of HTyr13.

2hcdhtyra1 #849 RT: 8.12 AV: 1 NL: 1.28E5  
F: FTMS - c ESI Full ms [115.00-1000.00]

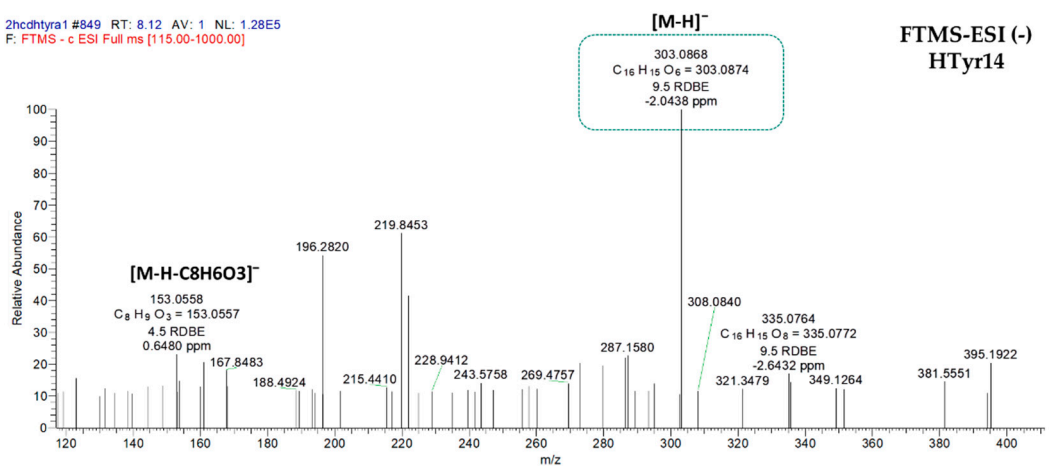

Figure S9: HRMS full scan spectrum of HTyr14.

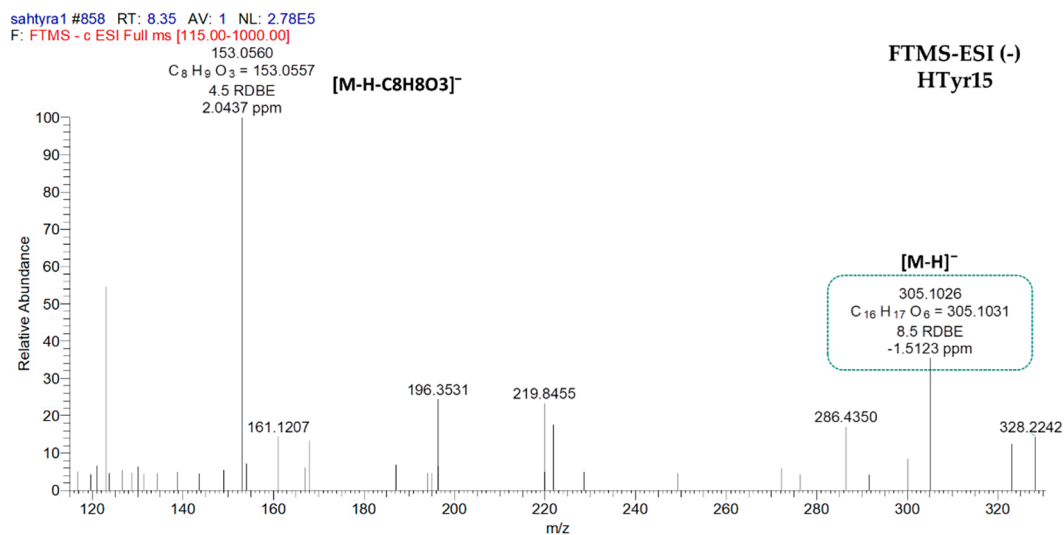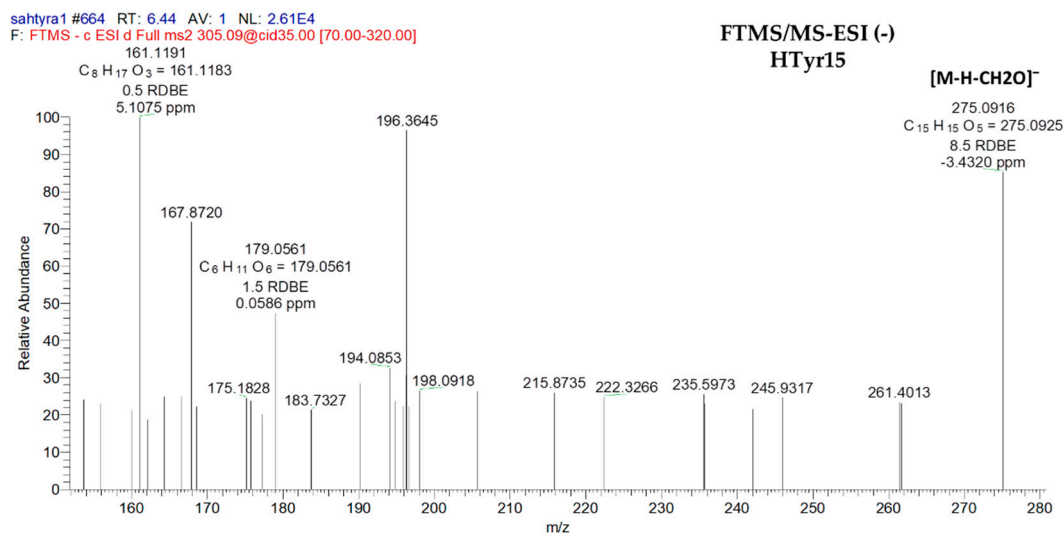

Figure S10: HRMS spectra, full scan (upper) and MS/MS (down) of HTyr15.

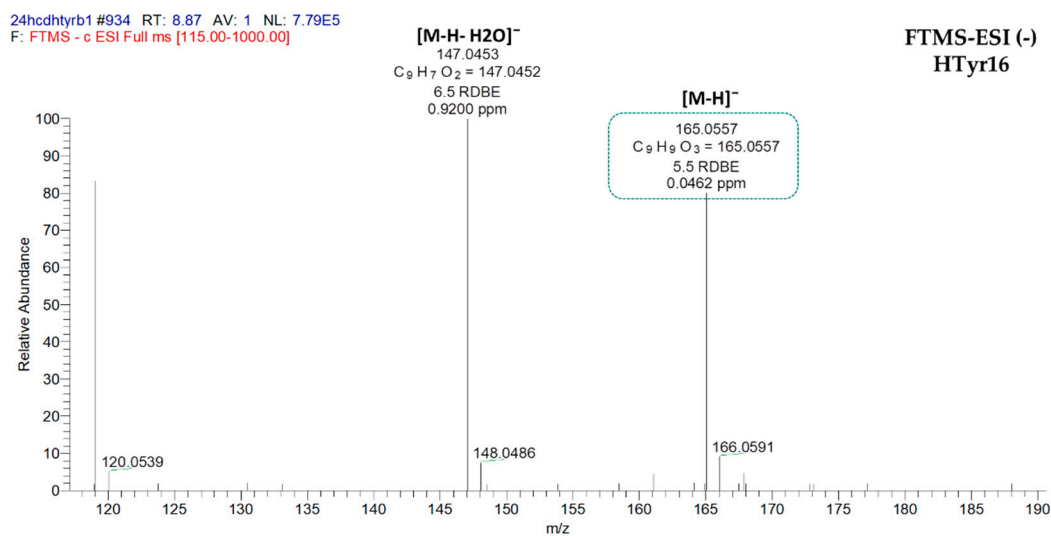



24hcdhtyrb1 #938 RT: 8.91 AV: 1 NL: 2.67E5  
 F: FTMS - c ESI d Full ms2 165.06@cid35.00 [50.00-180.00]

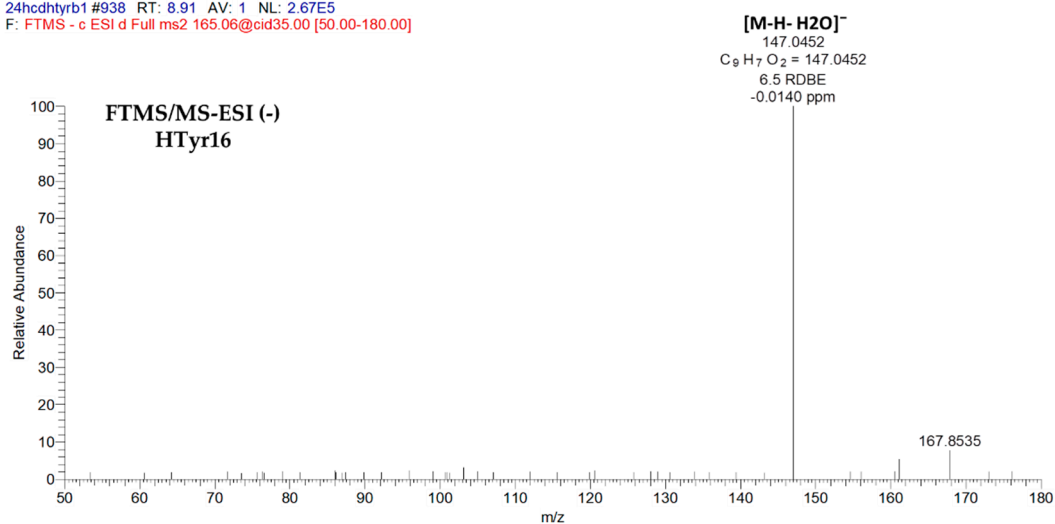

**Figure S11:** HRMS spectra, full scan (upper) and MS/MS (down) of **HTyr16**.

24hcdhtyrb1 #931 RT: 8.83 AV: 1 NL: 6.84E5  
 F: FTMS - c ESI Full ms [115.00-1000.00]

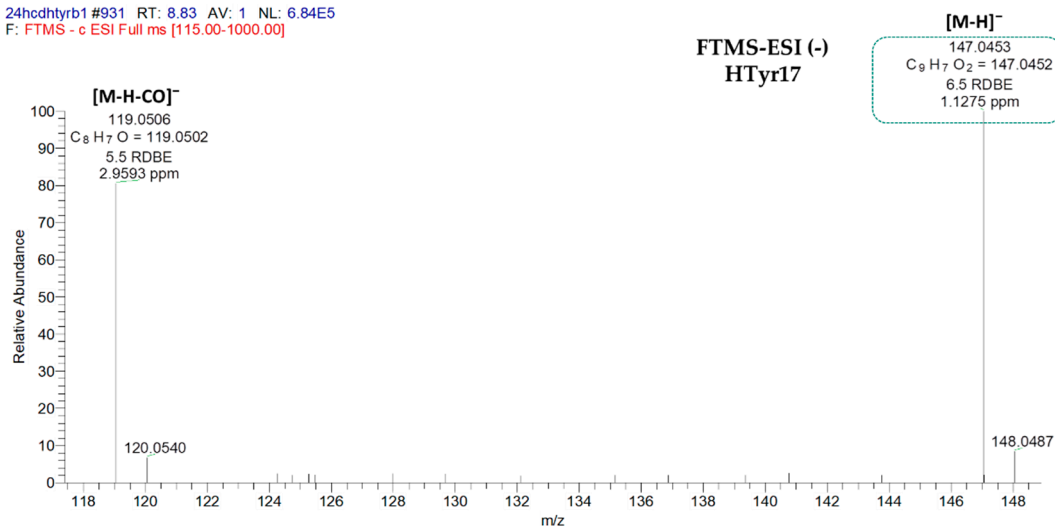

**Figure S12:** HRMS full scan spectrum of **HTyr17**.

sidhtyra1#1083 RT: 10.29 AV: 1 SB: 2441 10.36-25.00 , 0.01-10.18 NL: 6.99E4  
F: FTMS - c ESI Full ms [115.00-1000.00]

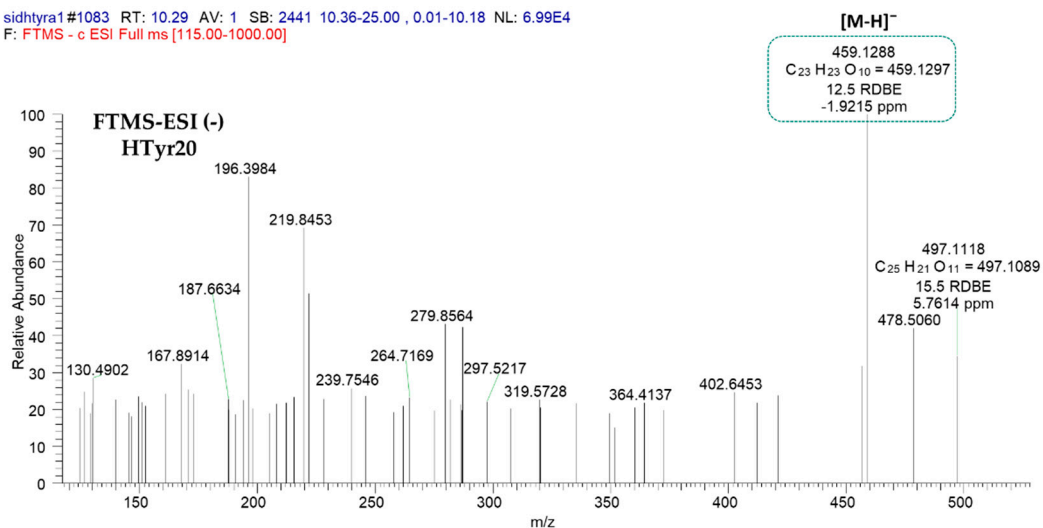

Figure S13: HRMS full scan spectrum of HTyr20.

sahtyra1 #945 RT: 9.23 AV: 1 NL: 5.45E5  
F: FTMS - c ESI Full ms [115.00-1000.00]

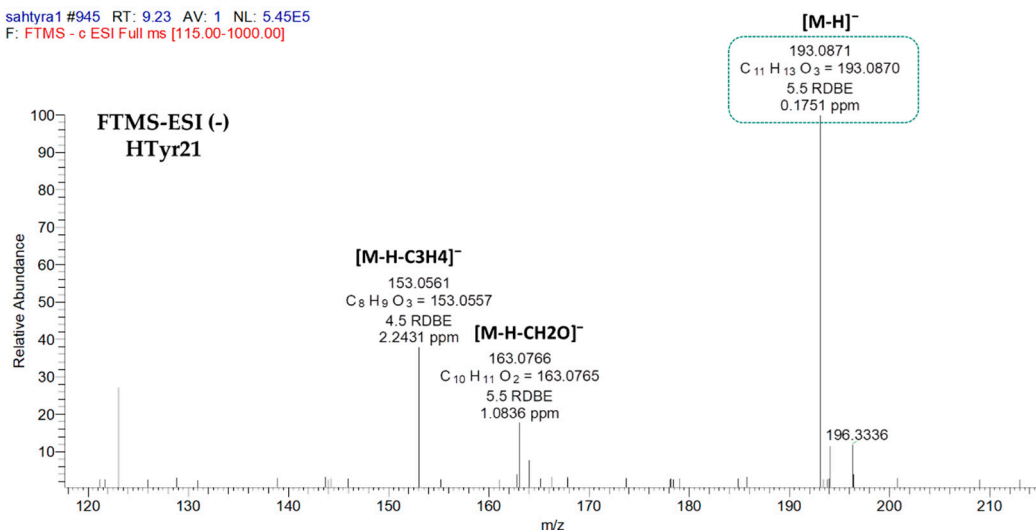

sahtyra1 #948 RT: 9.26 AV: 1 NL: 1.47E5  
F: FTMS - c ESI d Full ms2 193.09@cid35.00 [50.00-205.00]

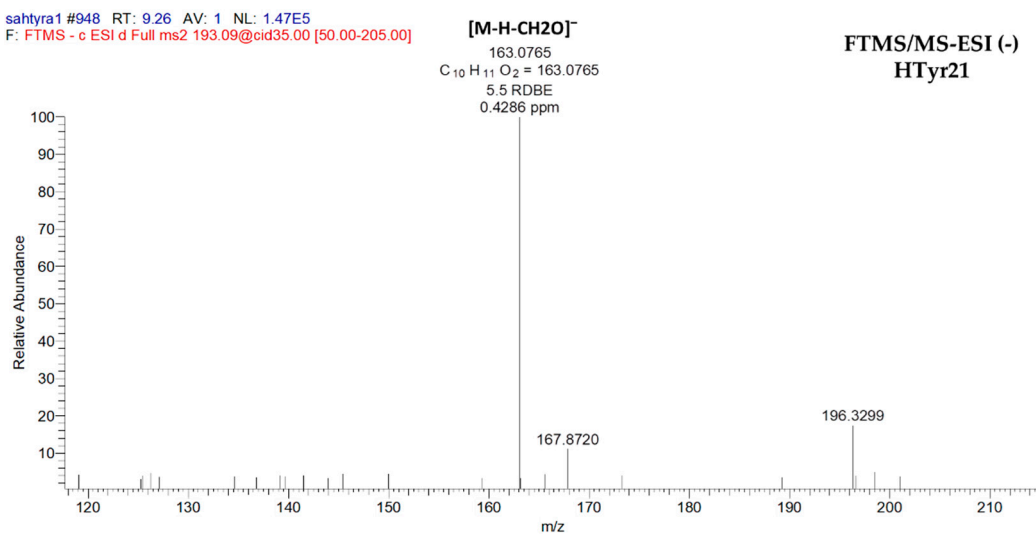

Figure S14: HRMS spectra, full scan (upper) and MS/MS (down) of HTyr21.

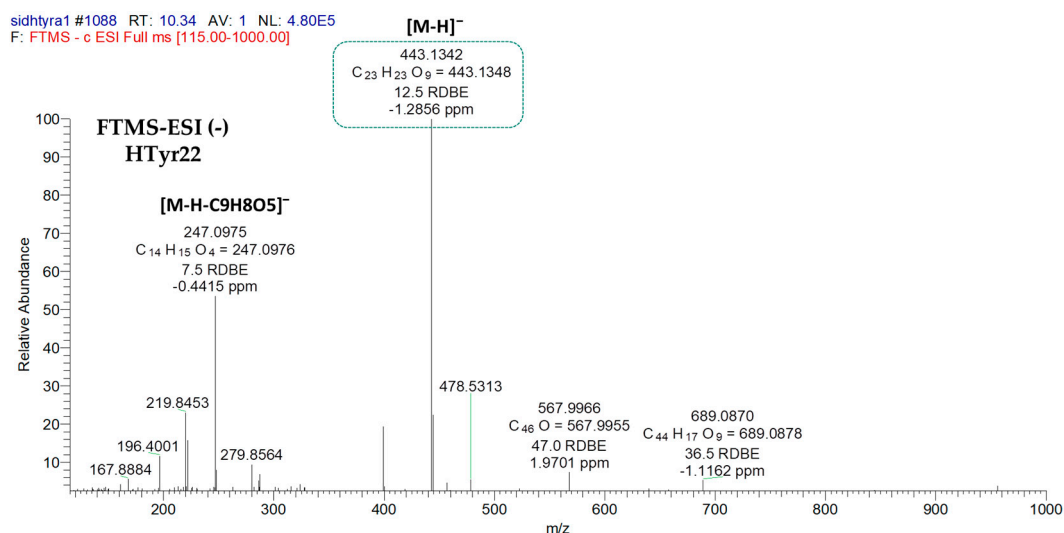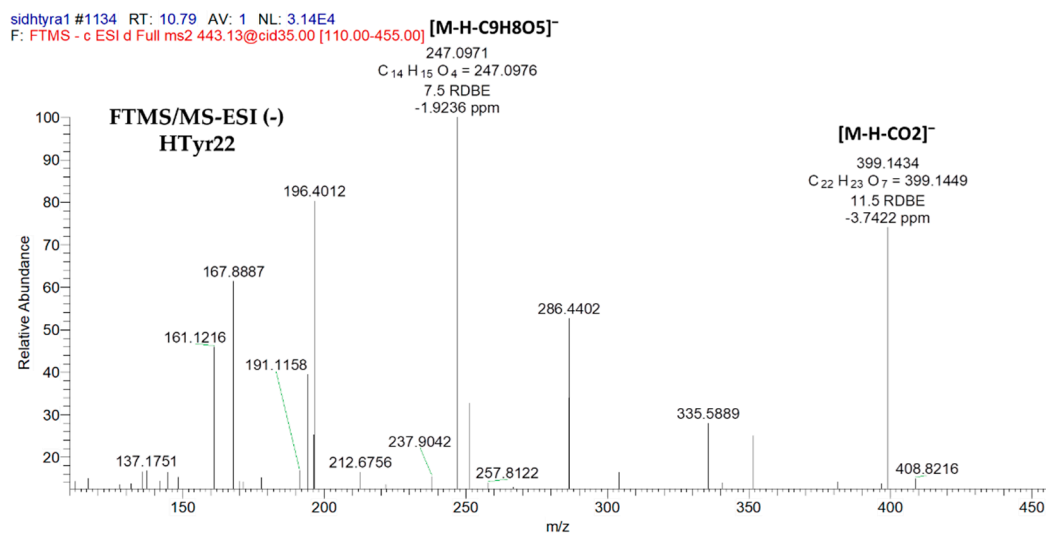

**Figure S15:** HRMS spectra, full scan (upper) and MS/MS (down) of HTyr22.

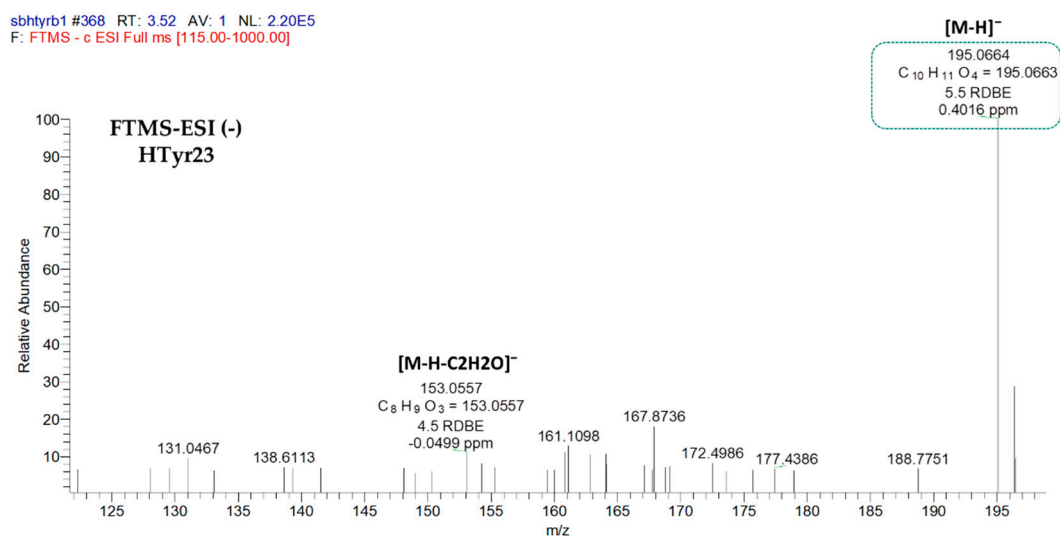

**Figure S16:** HRMS full scan spectrum of HTyr23.

sahtyra1 #1153 RT: 11.32 AV: 1 NL: 8.25E5  
F: FTMS - c ESI Full ms [115.00-1000.00]

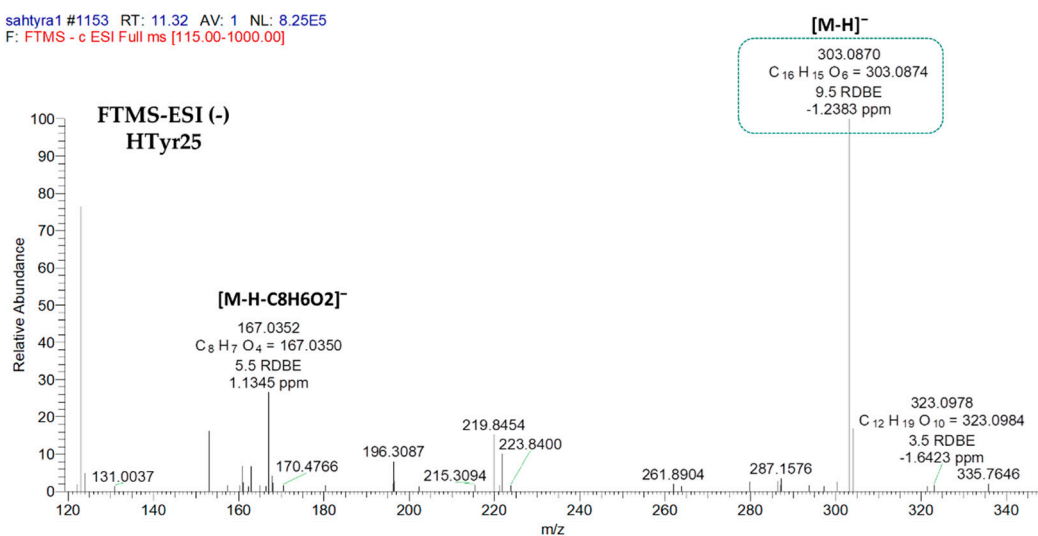

sahtyra1 #1157 RT: 11.37 AV: 1 NL: 2.64E4  
F: FTMS - c ESI d Full ms2 303.09@cid35.00 [70.00-315.00]

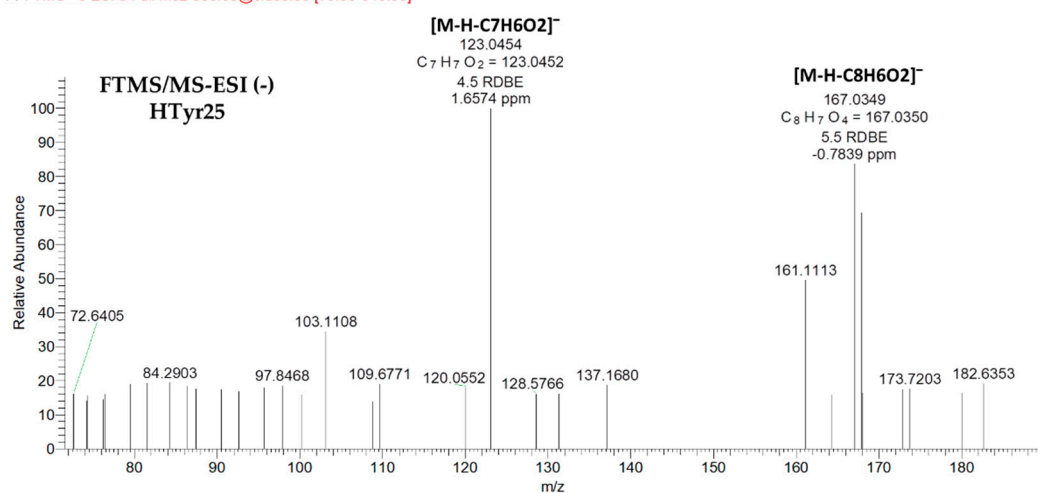

**Figure S17:** HRMS spectra, full scan (upper) and MS/MS (down) of HTyr25.

sahtyra1 #1189 RT: 11.69 AV: 1 NL: 3.02E6  
F: FTMS - c ESI Full ms [115.00-1000.00]

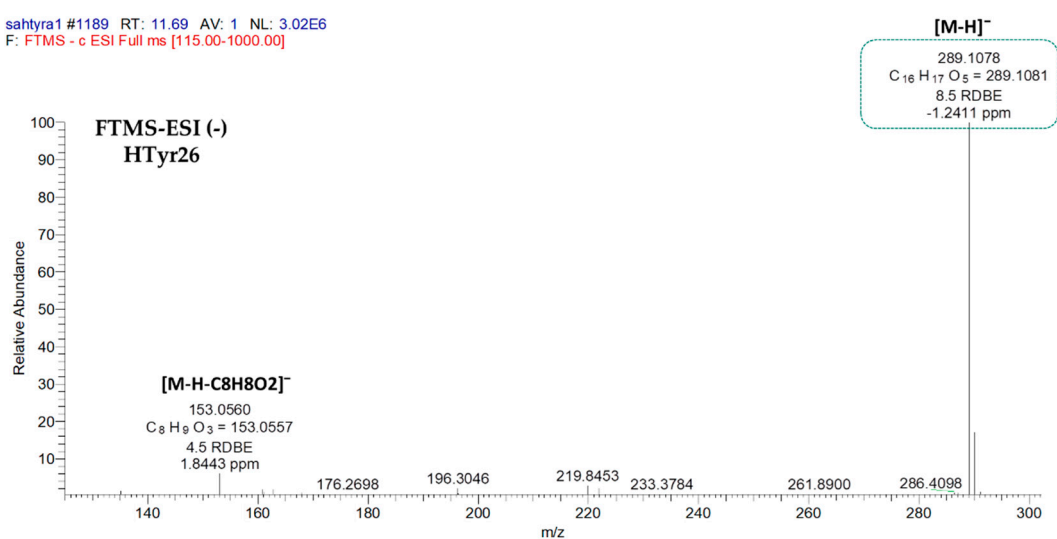

sahtyra1 #1194 RT: 11.74 AV: 1 NL: 9.09E4  
 F: FTMS - c ESI d Full ms2 289.11@cid35.00 [65.00-300.00]

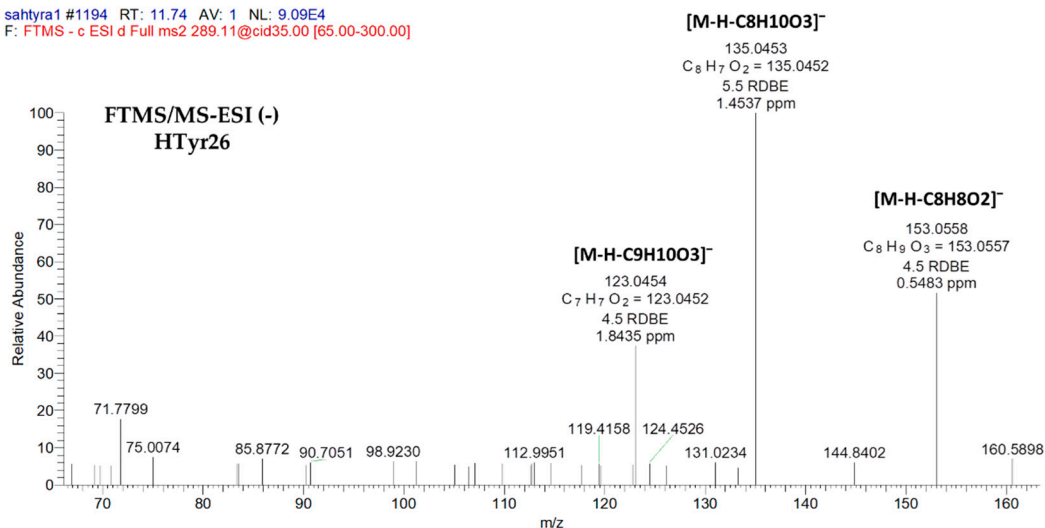

Figure S18: HRMS spectra, full scan (upper) and MS/MS (down) of HTyr26.

sidhtyra1 #1335 RT: 12.71 AV: 1 SB: 2439 12.78-25.00 0.01-12.57 NL: 1.61E5  
 F: FTMS - c ESI Full ms [115.00-1000.00]

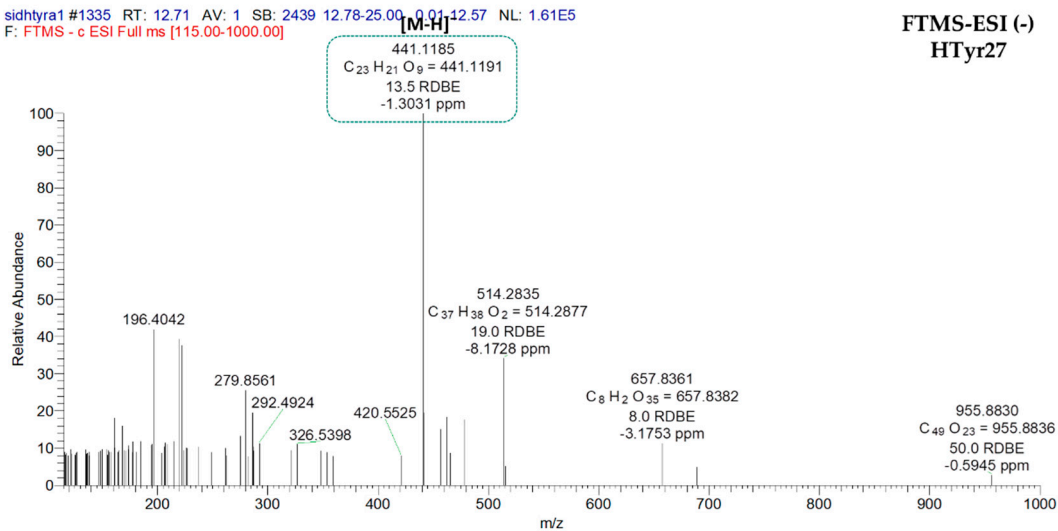

Figure S19: HRMS full scan spectrum of HTyr27.

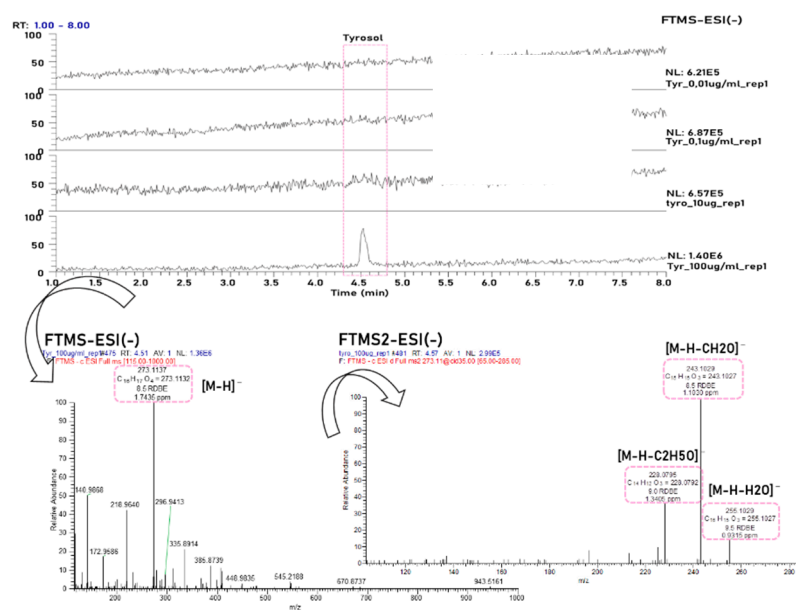

**Figure S20:** HRMS spectra, full scan of **Tyr1** in four concentrations (0.01ug/ml, 0.1ug/ml, 10ug/ml, 100ug/ml).

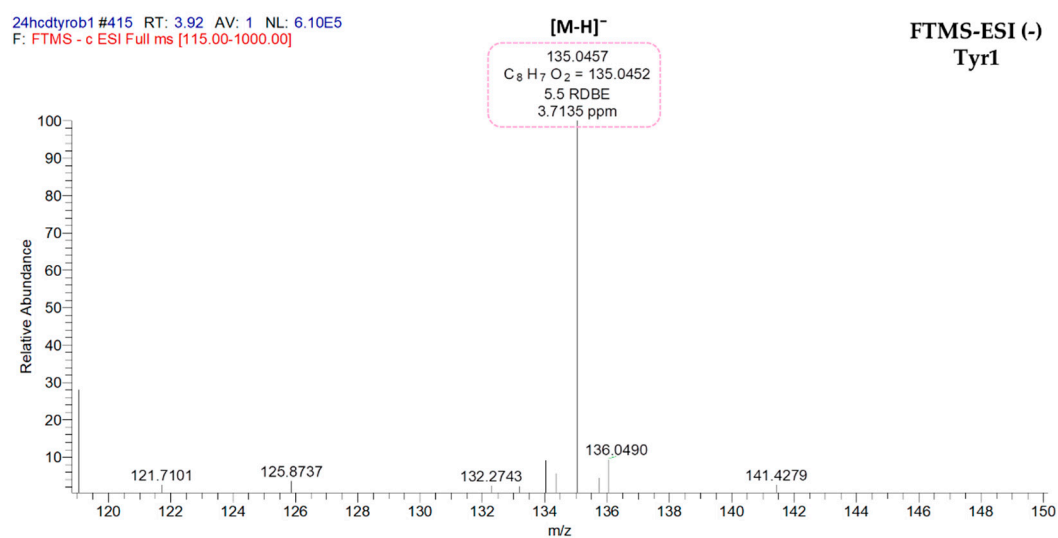

**Figure S21:** HRMS full scan spectrum of **Tyr1**.

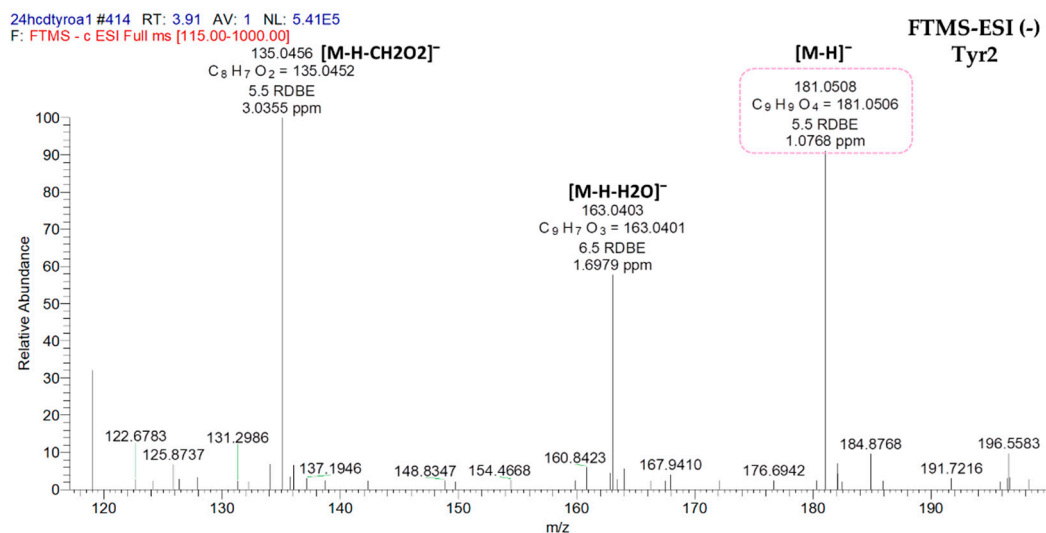

Figure S22: HRMS full scan spectrum of Tyr2.

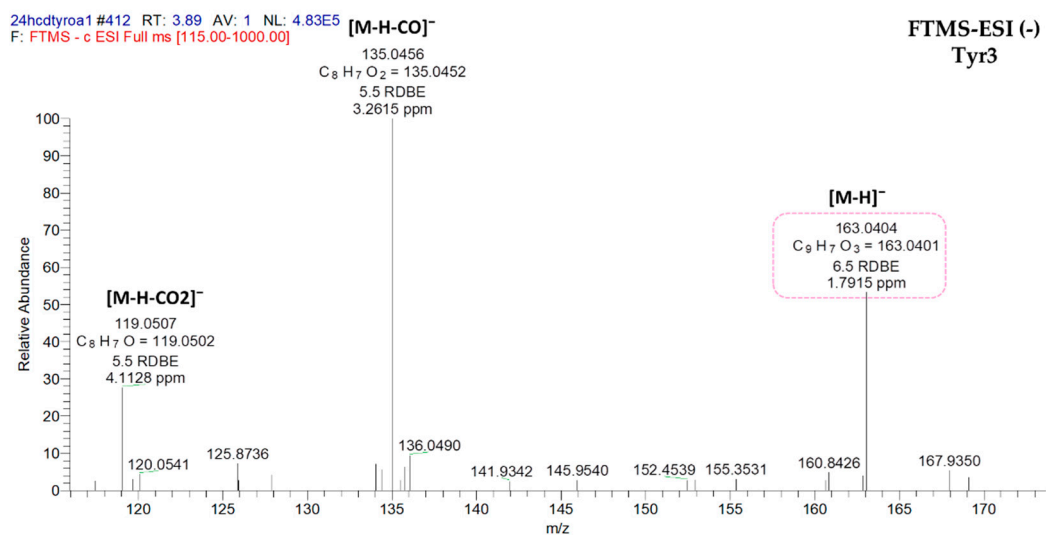

Figure S23: HRMS full scan spectrum of Tyr3.

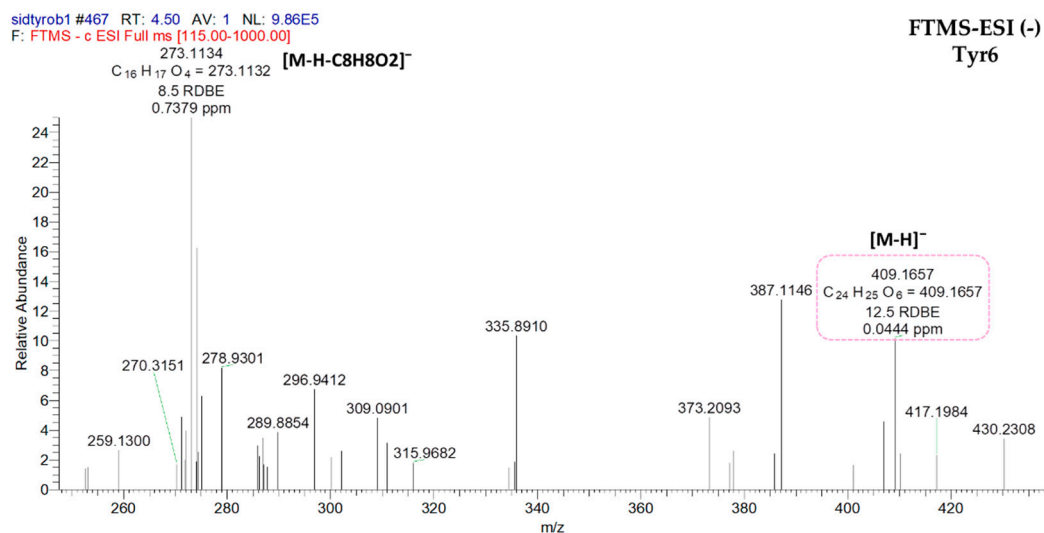

Figure S24: HRMS full scan spectrum of Tyr6.

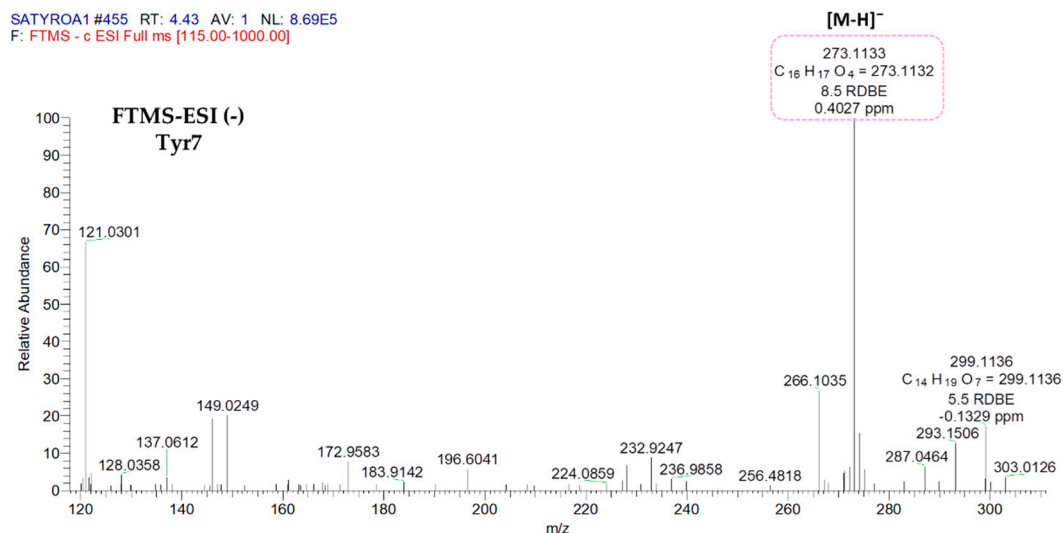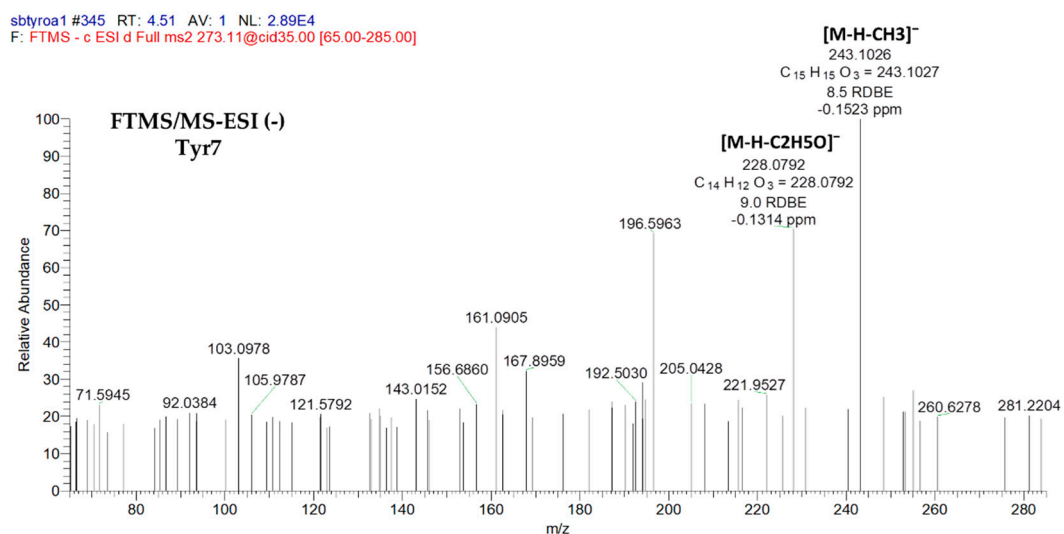

Figure S25: HRMS spectra, full scan (upper) and MS/MS (down) of Tyr7.



sidtyroa1 #538 RT: 5.21 AV: 1 SB: 491 0.01-5.06 NL: 2.72E5  
 F: FTMS - c ESI Full ms [115.00-1000.00]

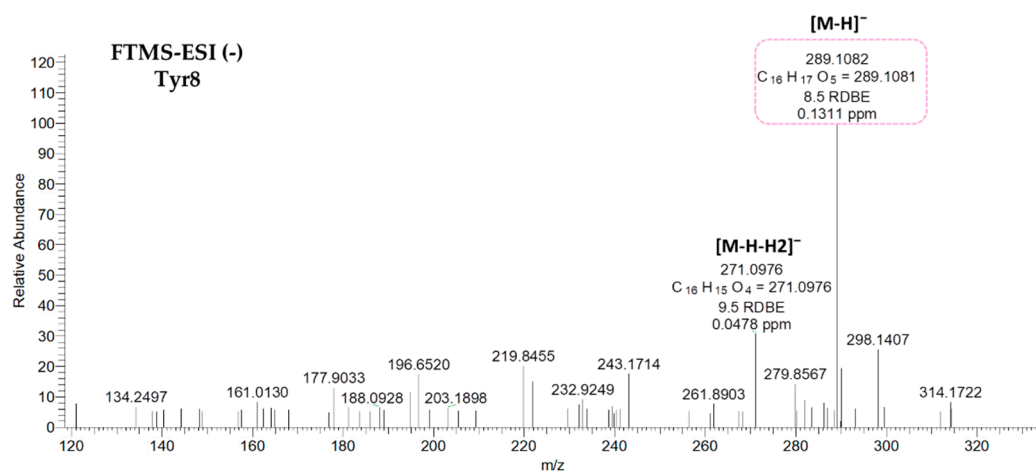

**Figure S26:** HRMS full scan spectrum of Tyr8.

24hcdtyroa1 #727 RT: 6.87 AV: 1 NL: 6.01E5  
 F: FTMS - c ESI Full ms [115.00-1000.00]

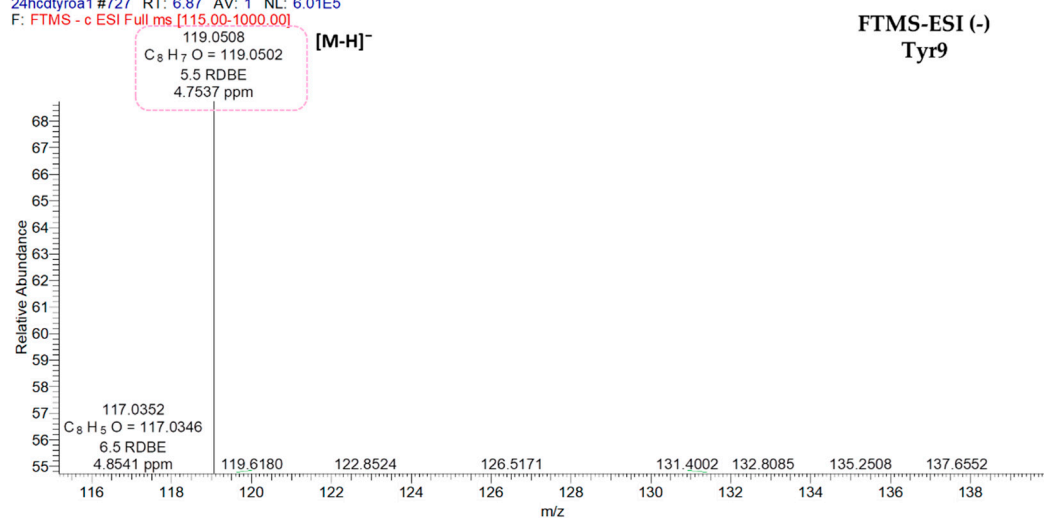

**Figure S27:** HRMS full scan spectrum of Tyr9.

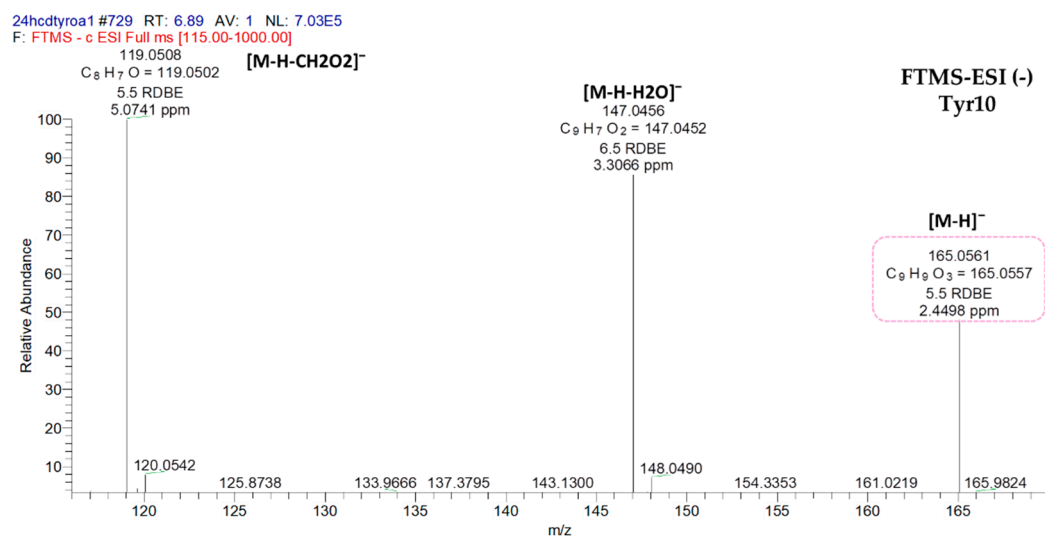

Figure S28: HRMS full scan spectrum of Tyr10.

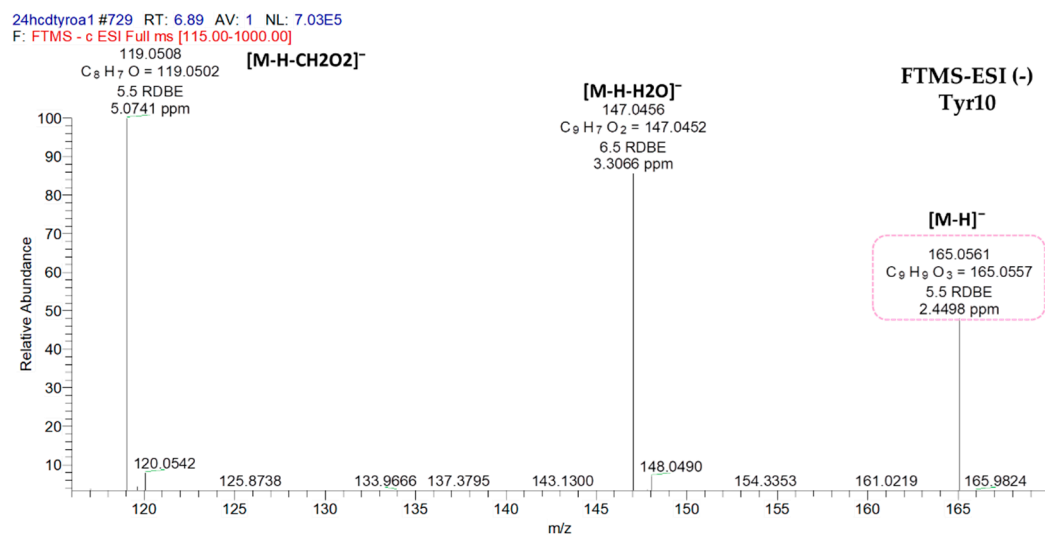

Figure S29: HRMS full scan spectrum of Tyr12.
